66. Bass NH, Lundborg P: Postnatal development of bulk flow in the cerebrospinal fluid system of the albino rat: Clearance of carboxyl-(14 C)inulin after intrathecal infusion. *Brain Res* 1973; 52:323–32
67. Lawson SJ, Davies HJ, Bennett JP, Lowrie MB: Evidence that spinal interneurons undergo programmed cell death postnatally in the rat. *Eur J Neurosci* 1997; 9:794–9
68. Kishimoto T, Bollen AW, Drasner K: Comparative spinal neurotoxicity of prilocaine and lidocaine. *ANESTHESIOLOGY* 2002; 97:1250–3
69. Walker SM, Goudas LC, Cousins MJ, Carr DB: Combination spinal analgesic chemotherapy: A systematic review. *Anesth Analg* 2002; 95:674–715
70. Werdehausen R, Braun S, Hermanns H, Kremer D, Küry P, Hollmann MW, Bauer I, Stevens MF: The influence of adjuvants used in regional anesthesia on lidocaine-induced neurotoxicity *in vitro*. *Reg Anesth Pain Med* 2011; 36:436–43
71. Davidson AJ, McCann ME, Morton NS, Myles PS: Anesthesia and outcome after neonatal surgery: The role for randomized trials. *ANESTHESIOLOGY* 2008; 109:941–4

## ANESTHESIOLOGY REFLECTIONS FROM THE WOOD LIBRARY-MUSEUM

### From Chloroform to Extract of Meat: Chemist and Entrepreneur Liebig

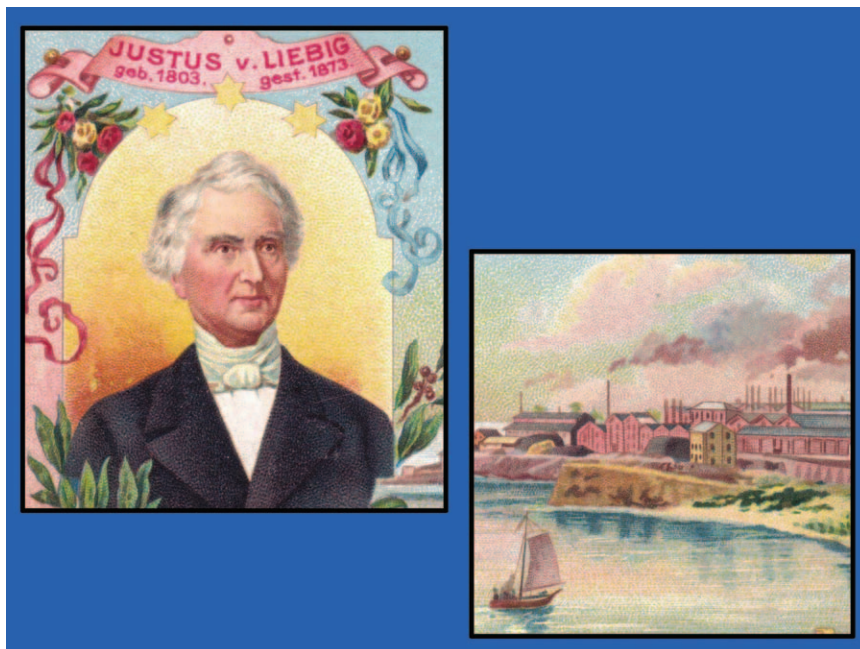

Nine years after independently discovering chloroform, Baron Justus von Liebig synthesized a meat substitute in 1840 that was eventually marketed as “Liebig’s Extract of Meat.” A Belgian engineer encouraged Liebig to open a processing plant in Fray Bentos, Uruguay, to generate the extract from cattle carcasses otherwise underutilized after processing for leather. In a time period before refrigeration when meat costs were high, this German–Belgian–Uruguayan collaboration prospered. As part of its advertising campaign, the company produced a colorful series of collectible trading cards. “Extracted” from the final card (in a series of six saluting “The Life of Liebig”) are images of Baron Liebig himself (*left*) and of his factory in Uruguay (*right*). In 1979 the factory closed. It is now a museum celebrating how a German chemist and a Belgian engineer founded a company which economically revitalized the nation of Uruguay and nutritionally supplemented the diets of people worldwide. (Copyright © the American Society of Anesthesiologists, Inc.)

George S. Bause, M.D., M.P.H., Honorary Curator, ASA’s Wood Library-Museum of Anesthesiology, Park Ridge, Illinois, and Clinical Associate Professor, Case Western Reserve University, Cleveland, Ohio. UJYC@aol.com.
